# Supplementary material
Source: publisher site journal article supplement (https://www.dovepress.com/article/543312)
Supplement: Supplementary file 1 [file supplementary%20table%201_1.docx]

**Supplementary Table 1 The Preliminary health education checklist for young people living with HIV Based on the Protection Motivation Theory**

| Primary indicators | Secondary indicators | indicators |
| --- | --- | --- |
|
|
| 1. Enhance perceived severity and susceptibility of non-adherence to treatment | 1.1 Basic knowledge of HIV/AIDS[1],[2] | 1.1.1 Definition and transmission of HIV/AIDS |
| 1.1.2 HIV/AIDS transmission routes |
| 1.1.3 HIV/AIDS incubation period and diagnosis |
| 1.1.4 HIV Clinical manifestations, staging, and disease progression |
| 1.1.5 Sources for acquiring HIV-related knowledge |
| 1.2 HIV Epidemiology and susceptibility factors[3] | 1.2.1 Global and domestic infection status |
| 1.2.2 Susceptible populations and factors |
| 1.3 Knowledge of ART[4],[5] | 1.3.1 Policies and auxiliary examinations related to ART treatment |
| 1.3.2 Common side effects of ART and medical management measures |
| 1.3.3 The importance, requirements, and measurements of treatment adherence |
| 1.3.4 Health consequences of non-adherence |
| 2. Enhance the perceived response efficacy of adherence to treatment | 2.1 Strengthen the confidence in the ability to adhere to treatment[6],[7] | 2.1.1 Reinforcing the belief that persistent treatment will effectively reduce the threat of disease |
| 2.1.2 Reinforce the belief that adhering to treatment will maintain physical health |
| 2.1.3 Demonstrating case studies on the benefits of adherence |
| 2.2 Benefits of adherence to treatment[2],[8],[9] | 2.2.1 HIV viral suppression and CD4+T lymphocyte function |
| 2.2.2 Definition, importance, and implementation of U=U (Undetectable = Untransmittable) |

Table 1 (continued)

| Primary indicators | Secondary indicators | Secondary indicators |
| --- | --- | --- |
|
|
| 3. Enhance self-efficacy in ART adherence | 3.1 Strengthen self-management [2],[10] | 3.1.1 Instruct patients to conduct regular tests and provide timely feedback. |
| 3.1.2 Management of HIV/AIDS-related symptoms |
| 3.1.3 Sexual behavior safety management |
| 3.2 Strengthen the confidence in the ability to adhere to treatment [2],[11] | 3.2.1 Methods for maintaining treatment adherence |
| 3.2.2 Showcases cases of long-term treatment adherence |
| 3.2.3 Treatment adherence skills training to boost confidence in sticking with treatment |
| 3.2.4 Provide mindful support. |
| 4. Reduce internal and external rewards of non-adherence | 4.1 Weaken the feeling of benefiting and external gains from non-adherence[5],[12],[13] | 4.1.1 Encourage patients to describe any maladaptive behaviors that may affect treatment adherence. |
| 4.1.2 Help patients analyze the internal causes of unhealthy behaviors and provide health guidance. |
| 4.1.3 Correcting patients' bad habits and the subjective sense of benefit that comes with them |
| 4.1.4 Affirm and encourage healthy behaviors in patients. |
| 4.2 Weakening the external benefits gained from non-adherence behavior[4],[8],[12] | 4.2.1 Reducing patients' internal feelings of shame and self-stigmatization |
| 4.2.2 Protection of the rights and privacy of people living with HIV |
| 4.2.3 Definition, manifestations, and consequences of HIV drug resistance |
| 4.3 Enhance social support [1],[2],[4],[13]–[15] | 4.3.1 Skills for disclosing HIV infection to family members, partners, and friends |
| 4.3.2 The social, family, and personal burdens that noncompliance may cause |
| 4.3.3 How to effectively obtain social and family support |
| 4.3.4 Health guidance on reproductive knowledge for young people of childbearing age |
| 4.4 Improve mental health[16],[17] | 4.4.1 Helping patients accept the fact of infection |
| 4.4.2 Regulation of negative emotions such as anxiety and depression |
| 4.4.3 Coping with stress |
| 4.4.4 Ways to seek help for psychological crises |
| 5. Reduce the response cost of treatment adherence | 5.1 Lower the barriers and costs associated with adherence to treatment [2],[12] | 5.1.1 Help PLHIV identify barriers to treatment and develop targeted solutions for different factors |
| 5.1.2 Dealing with drug side effects |
| 5.1.3 Daily life management, including diet, exercise, sleep patterns, smoking cessation, and alcohol consumption control |

References

[1] Nyogea D, Mtenga S, Henning L, et al. Determinants of antiretroviral adherence among HIV positive children and teenagers in rural Tanzania: A mixed methods study. *BMC Infect Dis*. 2015;15(1). doi:10.1186/S12879-015-0753-Y,]

[2] Heestermans T, Browne JL, Aitken SC, Vervoort SC, Klipstein-Grobusch K. Determinants of adherence to antiretroviral therapy among HIV-positive adults in sub-Saharan Africa: A systematic review. *BMJ Glob Health*. 2016;1(4). doi:10.1136/BMJGH-2016-000125,]

[3] Bossonario PA, Ferreira MRL, Andrade RL de P, et al. Fatores de risco à infecção pelo HIV entre adolescentes e jovens: revisão sistemática. *Rev Lat Am Enfermagem*. 2022;30(spe):e3697. doi:10.1590/1518-8345.6264.3697,]

[4] Jjumba I, Kanyesigye M, Ndagijimana G, et al. Perceived barriers and facilitators to antiretroviral therapy adherence among youth aged 15-24 years at a regional HIV clinic in SouthWestern Uganda: a qualitative study. *Afr Health Sci*. 2022;22(2):54-62. doi:10.4314/AHS.V22I2.7,]

[5] Kalichman SC, Eaton LA, Kalichman MO. Perceived sensitivity to medicines and medication concerns beliefs predict intentional nonadherence to antiretroviral therapy among young people living with HIV. *Psychol Health*. 2024;39(7):931-946. doi:10.1080/08870446.2022.2122462,]

[6] MacCarthy S, Wagner Z, Mendoza-Graf A, et al. A randomized controlled trial study of the acceptability, feasibility, and preliminary impact of SITA (SMS as an Incentive to Adhere): A mobile technology-based intervention informed by behavioral economics to improve ART adherence among youth in Uganda. *BMC Infect Dis*. 2020;20(1). doi:10.1186/S12879-020-4896-0,]

[7] Mengesha MM, Teshome A, Ajema D, Tura AK, Hallström IK, Jerene D. The association between HIV diagnosis disclosure and adherence to anti-retroviral therapy among adolescents living with HIV in Sub-Saharan Africa: A systematic review and meta-analysis. *PLoS One*. 2023;18(5 MAY). doi:10.1371/JOURNAL.PONE.0285571,]

[8] Johnson-Peretz J, Lebu S, Akatukwasa C, et al. “I was still very young”: agency, stigma and HIV care strategies at school, baseline results of a qualitative study among youth in rural Kenya and Uganda. *J Int AIDS Soc*. 2022;25(S1). doi:10.1002/JIA2.25919,]

[9] Hlophe LD, Tamuzi JL, Shumba CS, Nyasulu PS. Barriers and facilitators to anti-retroviral therapy adherence among adolescents aged 10 to 19 years living with HIV in sub-Saharan Africa: A mixed-methods systematic review and meta-analysis. *PLoS One*. 2023;18(5 May). doi:10.1371/JOURNAL.PONE.0276411,]

[10] Stonbraker S, Richards S, Halpern M, Bakken S, Schnall R. Priority Topics for Health Education to Support HIV Self-Management in Limited-Resource Settings. *Journal of Nursing Scholarship*. 2019;51(2):168-177. doi:10.1111/JNU.12448,]

[11] Bongfen MC, Torpey K, Ganle J, Ankomah A. Level of adherence and associated factors among HIV-positive adolescents on antiretroviral therapy in Cameroon. *African Journal of AIDS Research*. 2020;19(4):269-275. doi:10.2989/16085906.2020.1833055,]

[12] MacCarthy S, Saya U, Samba C, Birungi J, Okoboi S, Linnemayr S. “how am i going to live?”: Exploring barriers to ART adherence among adolescents and young adults living with HIV in Uganda. *BMC Public Health*. 2018;18(1). doi:10.1186/S12889-018-6048-7,]

[13] Mugo C, Njuguna IN, Beima-Sofie K, et al. Adolescent experiences, perceptions, and preferences for the process of HIV status disclosure in Kenya. *Front Public Health*. 2023;11. doi:10.3389/FPUBH.2023.1165557,]

[14] Nakimuli-Mpungu E, Musisi S, Wamala K, et al. Effectiveness and cost-effectiveness of group support psychotherapy delivered by trained lay health workers for depression treatment among people with HIV in Uganda: a cluster-randomised trial. *Lancet Glob Health*. 2020;8(3):e387-e398. doi:10.1016/S2214-109X(19)30548-0]

[15] Nakimuli-Mpungu E, Smith CM, Wamala K, et al. Long-Term Effect of Group Support Psychotherapy on Depression and HIV Treatment Outcomes: Secondary Analysis of a Cluster Randomized Trial in Uganda. *Psychosom Med*. 2022;84(8):914-923. doi:10.1097/PSY.0000000000001128,]

[16] Fawzi MCS, Ng L, Kanyanganzi F, et al. Mental health and antiretroviral adherence among youth living with HIV in Rwanda. *Pediatrics*. 2016;138(4). doi:10.1542/PEDS.2015-3235,]

[17] Evans-Gilbert T, Kasimbie K, Reid G, Williams SA. Psychosocial outcomes in a cohort of perinatally HIV-infected adolescents in Western Jamaica. *Paediatr Int Child Health*. 2018;38(3):175-180. doi:10.1080/20469047.2018.1428074,]
